# Supplementary material
Source: publisher figshare collection journal article supplement (https://acs.figshare.com/ndownloader/files/4031776)
Supplement: Supplementary file 1 [file 4031776]

## Supporting Information

### Interaction between Histidine and Zn(II) Metal Ions over a Wide pH as Revealed by Solid-State NMR Spectroscopy and DFT Calculations

Lei Zhou, Shenhui Li, Yongchao Su, Xianfeng Yi, Anmin Zheng and Feng Deng

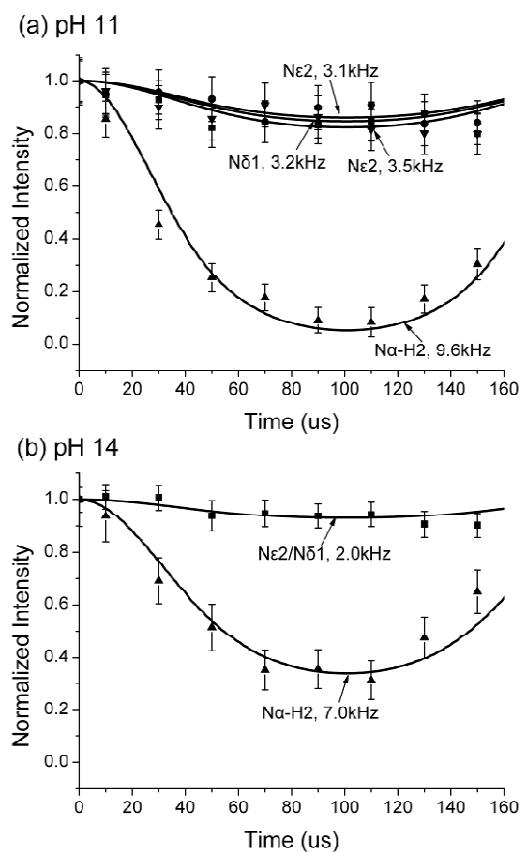

**Figure S1.**  $^{15}\text{N}$ - $^1\text{H}$  dipolar couplings, which are obtained from DIPSHIFT experiment in double version, of 25% diluted  $\text{U-}^{13}\text{C}$ ,  $^{15}\text{N}$ -labeled histidine upon Zn(II) binding prepared at (a) pH 11, (b) pH 14. The simulated coupling strengths are indicated. The real  $^{15}\text{N}$ - $^1\text{H}$  dipole couplings are deduced after taking into account the PMLG scaling factor.

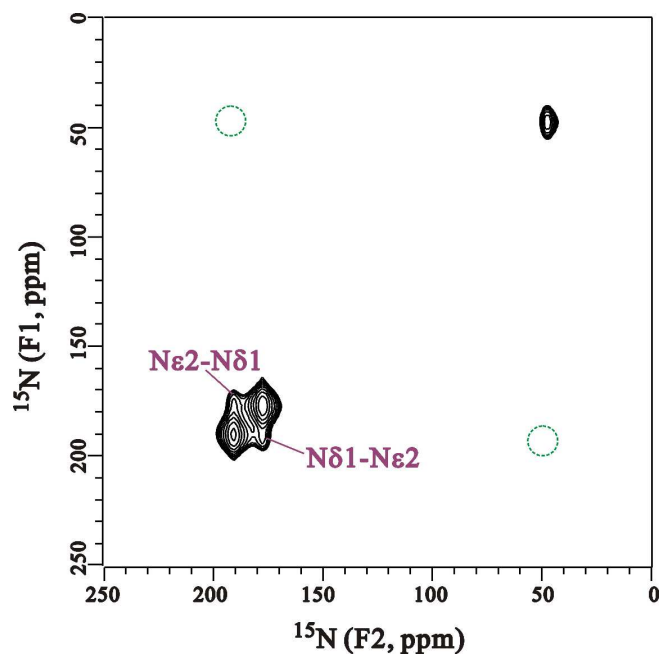

**Figure S2.** 2D  $^{15}\text{N}$ - $^{15}\text{N}$  homo-nuclear correlation NMR spectrum of U- $^{13}\text{C}$ ,  $^{15}\text{N}$ -labeled histidine hydrochloride monohydrate. The PDSD mixing time was set to 4 s.

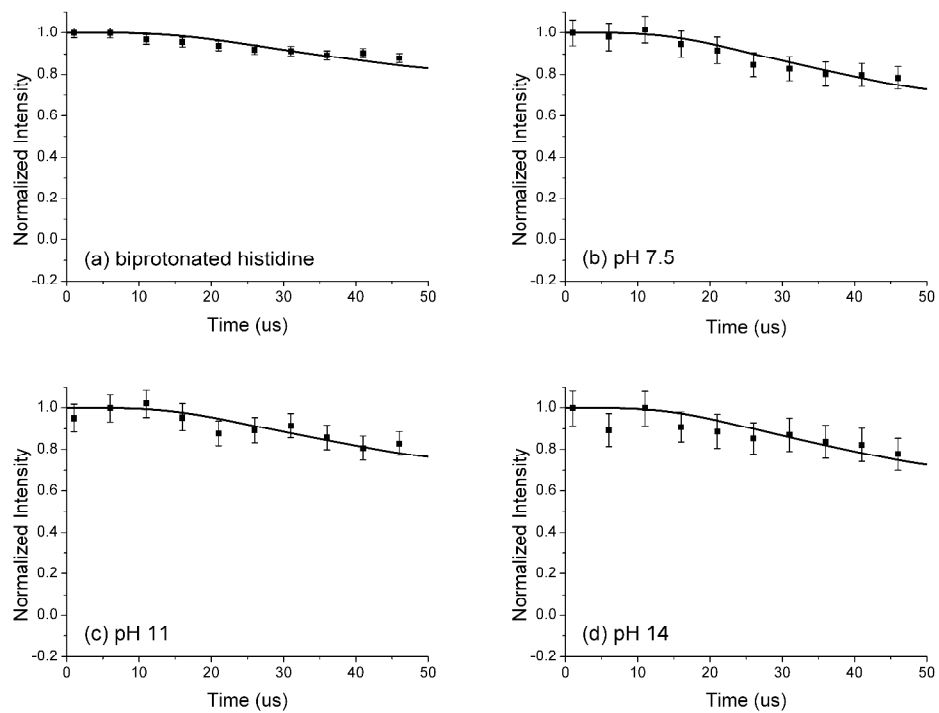

**Figure S3.** CSA dephasing curves for  $^{15}\text{N}_\alpha$  site of (a) biprotonated histidine, and 25% diluted  $\text{U-}^{13}\text{C}$ ,  $^{15}\text{N}$ -labeled histidine upon  $\text{Zn(II)}$  binding prepared at (b) pH 7.5, (c) pH 11, and (d) pH 14.

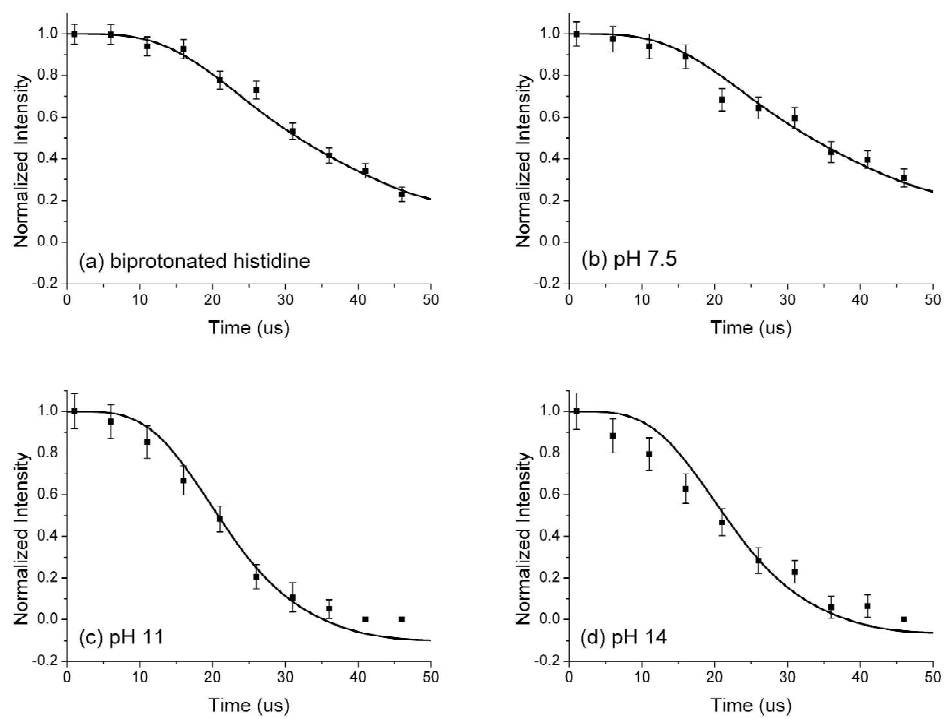

**Figure S4.** CSA dephasing curves for imidazole  $^{15}\text{N}_{\epsilon 2}$  site of (a) biprotonated histidine, and 25% diluted  $\text{U-}^{13}\text{C}$ ,  $^{15}\text{N}$ -labeled histidine upon  $\text{Zn(II)}$  binding prepared at (b) pH 7.5, (c) pH 11, and (d) pH 14.

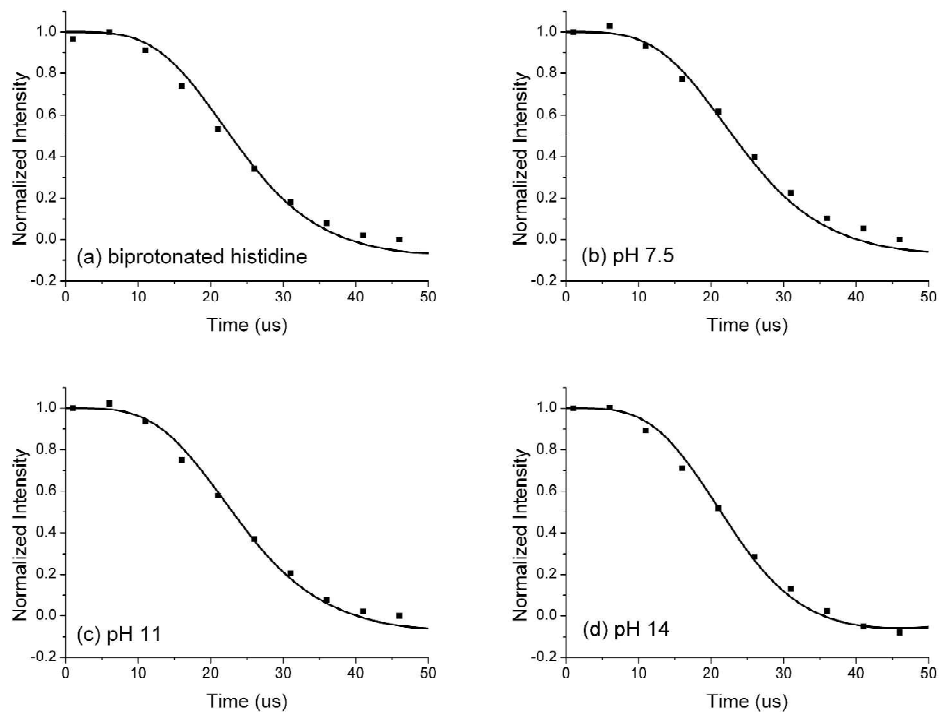

**Figure S5.** CSA dephasing curves for imidazole  $^{13}\text{C}_{\epsilon 1}$  site of (a) biprotonated histidine, and 25% diluted  $\text{U-}^{13}\text{C}$ ,  $^{15}\text{N}$ -labeled histidine upon  $\text{Zn(II)}$  binding prepared at (b) pH 7.5, (c) pH 11, and (d) pH 14.
